# Supplementary material
Source: Research Square preprint supplement (doi:10.21203/rs.3.rs-9650127/v1)
Supplement: Supplementary file 1 [file 997669669a89b813f0e50eef.docx]

Focus Group Discussion Guide

**Background (5 mins)**

- **Introduction** of self, note-taker and ORIMA Research.
- **About the research:**
  1. We are doing research today on behalf of the Commonwealth Scientific and Industrial Research Organisation (CSIRO).
  2. We’re here to talk about citizen science, and your thoughts and opinions on this (it is ok if you don’t know what this means).
- **Confidentiality and anonymity**:
  1. Any information we gather will be held in strict confidence, which means we won’t tell anyone that you participated in the group or use any names or information that could tell people who you are or what you said.
  2. We will write a report that will talk about the broad themes and findings across the whole study and will include some quotes/ case studies in the report to help demonstrate the findings. We won’t use any information in the report that could identify individuals. For example, we might say “some people felt that…, while other people thought…”, but we won’t use your name or any details unique to you.
- **Observations and recording**:
  1. Confirm consent for notetaking and recording.
  2. (If relevant) confirm consent for any observers.
- **Group rules**:
  1. No right or wrong answers, and different points of view encouraged. Please be as open and honest as possible.
  2. We have a range of questions for the group today. You can skip any questions you don’t feel comfortable answering. If you would like to leave the discussion at any point, please let us know.
  3. The session will take up to 1 hour and 30 minutes.
- **Online considerations**:
  1. Online – IT support if needed.
  2. Ensuring contribution – moderator to direct conversation, use of chat function/ hands up.
- **Consent**: based on everything we have talked about so far are you able to confirm that you are happy to proceed by providing your verbal consent? ***[moderator to tick next to name]***

**1.** **Warm-up questions (5 mins)**

| *This section is to build inter-group rapport and provide the moderator with context to draw on throughout the discussion.* |
| --- |

1. Name
2. What are you up to – studying, working/ looking for work, caring responsibilities?
3. Living arrangements – e.g. partner, children, housemates, pets?

**2.** **Awareness and understanding of ‘citizen science’ (10 mins)**

| *This section will explore participants’ pre-existing awareness and understanding of, and associations with, the term ‘citizen science’ (before providing them with further information and explanation about the term and the topic).* |
| --- |

**Awareness and top of mind associations**

1. Before being invited for the research, had you heard the term ‘citizen science’?
2. What comes to mind when you hear the term ‘citizen science’? ***[Participants to write 1-2 words in the chat function]***
   1. What does it mean to you?
   2. How does it make you feel?

Understanding of citizen science

1. What is citizen science? How would you describe it to someone?
2. What kinds of citizen science can people do? *Check for topic areas, types of activities*
3. Who can be a citizen scientist? Are there any requirements?
4. Who runs citizen science projects? How can you get involved in citizen science?

Sources of awareness and understanding

1. How do you know what you know about citizen science?
2. Have you seen or heard anything about citizen science recently? What? When? Where?
3. Have you previously participated in citizen science or thought about doing so? *[Explore what, when, why, how]*

**3.** **Perceptions of citizen science (10 mins)**

| *This section will begin by explaining and clarifying the term ‘citizen science’ to ensure all participants are on the same page. We will then establish participants’ perceptions of, and interest in, citizen science.* |
| --- |

***Moderator to explain/ clarify:*** *Citizen science refers to the concept of engaging members of the public in science* *and has been utilised for many years in environmental studies, such as observing plants and wildlife. There are a range of stages of the research process that people could be involved in on citizen science projects including answering survey questions, collecting data, defining research topics and working with scientists to analyse data or write scientific reports. The Backyard Bird Count is an example of a citizen science project – where people contribute to science by observing and recording birds in their yard, but have also learnt scientific skills, by using the identification manual and by reading the results. There are a range of different types of citizen science projects and topic areas.*

**Perceptions of citizen science**

1. What are the potential **benefits** of citizen science? What are the potential **drawbacks?**

- Prompt as needed: For you? For your community? For science?

1. How do you feel when you think about being involved in citizen science personally? Why?
2. On a scale of 0-10, how interested are you in participating in citizen science projects? (0 = not at all interested, 10 = very interested) ***[Participants to write score in the chat function]*** Why?
3. How interested do you think others would be in participating in citizen science? Prompt as needed: among your friends/ family or the broader community?

**4.** **Health and wellbeing citizen science (20 mins)**

| *This section will serve as an introduction to the specific topic of health and wellbeing citizen science, establish participants’ health and wellbeing priorities, and establish the types of topics, types of research and research activities they are interested in participating in.* |
| --- |

***Moderator to explain****: to date, citizen science approaches have largely been used in environmental research. However, CSIRO is interested in exploring opportunities to increase the use of citizen science in the areas of health and wellbeing. The rest of our discussion with be focused on health and wellbeing. We will not be focussing on your personal/ individual health in this discussion (i.e. the discussion will be general and you do not need to share any private information about health conditions etc.)*

**Health and wellbeing priorities**

Thinking more broadly about health and wellbeing…

1. What sorts of health and wellbeing related topics do you think are most important/ significant for the Australian population at the moment?
2. What sorts of things do people currently do to support or maintain good health and wellbeing? Is there anything that you think people should be doing more of?
3. Do these align with your own interest/ priorities when it comes to health and wellbeing? Why/ why not?

**Health and wellbeing citizen science topics**

1. Can you think of any benefits to participating in health and wellbeing citizen science? Any drawbacks?
   - For yourself? For the community? For science?
2. If citizen science projects were developed to explore health and wellbeing, what topics would you be most interested in? *e.g. nutrition, physical activity, chronic conditions, mental health, community health* ***[Moderator to list]***
3. Looking at all these topics, which would you **most** be interested in being a part of? Why?
4. What types of research would you be most interested in? *– e.g. identifying problems, developing or delivering interventions, evaluating/ assessing existing initiatives, collecting or providing data for studies, etc*

**Types of engagement/ involvement**

1. What kinds of things would you be interested in doing as part of a health and wellbeing citizen science project? ***[Moderator to show types of activities listed on back page to stimulate discussion – ask participants to select top 3]***
2. How involved or engaged would you want to be in citizen science projects? *[Probe for one-off/ ongoing, simple/ in-depth, etc]*

**5.** **Motivators and barriers to participation (15 mins)**

| *This section will identify participants’ reported likelihood of participating in health and wellbeing citizen science projects, and their motivators and barriers to participating.* |
| --- |

**Motivators/ barriers to participation in health and wellbeing citizen science**

1. Is there anything that would encourage or motivate you to participate in citizen science projects? Is there anything that would make it easier? What? ***[Moderator to list]*** Why?
2. Is there anything that stops you or makes it harder to participate in citizen science projects? What? ***[Moderator to list]*** Why? Which is the biggest barrier? *If not mentioned, check for: privacy concerns/ sharing personal health information*
3. On a scale of 0—10, how likely would you be to participate in citizen science specifically in the area of **health and wellbeing** in the future? ***[Participants to write score in chat]*** Why did you give this score?

**6.** **Strategies to support engagement (20 mins)**

| *This section will identify strategies to support participants’ engagement in health and wellbeing citizen science (including strategies for overcoming potential barriers or enhancing interest and engagement), preferred language and information needs/ preferences.* |
| --- |

*We’d now like you to think about things that could be done to encourage you and make it easier for you, as well as make you feel more interested in getting involved in citizen science projects related to health and wellbeing.*

**Alternative descriptions of citizen science**

1. So far, we have been using the phrase ‘citizen science’. Now that you have talked more about it, how useful do you think this term is to describe the concept of engaging the public in science? Why?
2. Are there other words or phrases that you prefer (i.e. that would provide a more accurate description or make you more interested in participating) *Check for: participatory science, collaborative science, co-design science* ***[Moderator to write up suggestions and have participants vote for preferred terms]***

**Supporting engagement**

1. Have you seen/ heard of any examples of projects which supported citizen engagement in science? *If yes:* What made it effective at engaging people?
2. Thinking about the barriers to participating in citizen science that we have discussed, what would help overcome these?
3. How would you want to stay involved or be engaged with across the life of a project?
4. Is there anything you need to make it easier for you to participate in citizen science projects? What? *(e.g. user-friendly online tools/ platforms/ apps, project support contacts/ facilitators, citizen science community/ online forums/ social media groups/ local meet-ups, education and training)*
5. Are there any other strategies or ways to get people in the community interested in participating in citizen science in the area of health and wellbeing? *(e.g. incentives, gamification, collaboration/ feedback, recognition/ acknowledgements)*

**Information and communications needs and preferences**

1. Would you like more information about potential future citizen science opportunities in the area of health and wellbeing? Why/ why not?
2. What are the main things you want to know?
3. How do you prefer to get information on a topic like this? How would you like to find out about citizen science opportunities in relation to health and wellbeing?
4. Who should this information come from? Who would you trust on this topic?
5. Are there times when this information would be more relevant to you? How often/ when do you want to/ need to hear about this topic?
6. What communication style would/ wouldn’t work for this topic? Are there some ways that are better/ more effective for communicating about this topic? Anything to avoid?

**7. Conclusion (5 mins)**

1. Did you learn anything new from today’s discussion? What?
2. Are you likely to do anything differently after today’s discussion? What and why?
3. Now that you have participated:
   - - How do you feel about participating in health and wellbeing citizen science?
     - How would you explain citizen science to a friend?

**8.** **Finish**

Summarise outcomes:

- We are doing this research on behalf of the CSIRO.
- The purpose of this research is to find out how much people know about citizen science, and how best to encourage Australians to participate in health and wellbeing research.

Thank participants and explain process for thankyou payment (i.e. EFT transfer).

**Research prompts**

| Citizen science activities | 1. **Collecting or providing data:**  - *Completing a survey* - *Recording personal health data* - *Conducting fieldwork (with community members or self)* - *Taking photos* - *Keeping a diary/ activity log*  1. **Analysing or interpreting data**  - *Reviewing or discussing basic findings* - *Coding and theming data* - *Discussing interpretations* - *Solutions generation*  1. **Refining research questions** 2. **Co-designing research questions and/or research methods** *(either leading design or co-designing with a scientist)* 3. **Sharing research findings**  - *Contributing to writing of articles* - *Disseminating information publicly* - *Advocating for solutions with stakeholders*  1. **Defining the problems to be explored** 2. **Project evaluation and follow-up** 3. **Education and training in research skills or dissemination** |
| --- | --- |
| Specific examples (for use as required to support understanding) | - **The Big Sleep Survey:** solicited the contribution of participants who monitored their sleeping habits for one week for the Woolcock Institute and Sydney University. More than 3,500 people completed the week-long sleep diaries recording the time they went to bed, fell asleep and woke up. - **DustSafe:** focused on characterising household dust in an effort to understand the potential health exposure hazards residing in that dust. Members of the public submit vacuum dust samples for chemical and biological analysis. - **Strava***:* the international social fitness network, has an Australian membership of self-quantifiers who measure physical performance, primarily tracking cycling and running activities using GPS data. Australian researchers have partnered with Strava members in a range of studies, such as understanding the personal data practices of commuting cyclists, for example. - **QuestaGame** (gamification)**:** launched in 2014 in Canberra through a crowdfunding campaign. The game has players around the world mapping biodiversity sightings and sending photographs through the QuestaGame mobile app for identification. The data feeds are downloaded for research, of which 1.6 million verifications have been identified. - **FoodSwitch** (health promotion)**:** a mobile phone app that allows users to access easy-to-understand information about the nutritional characteristics of packaged foods and, where available, to suggest healthier alternative products. There is a crowdsourcing function whereby users are able to contribute information on missing products. If a barcode is scanned but the corresponding Universal Product Code (UPC) is not identified in the database, then the user is prompted to photograph the front of the package, the Nutrition Information Panel (NIP), and the ingredients list. The data are uploaded to the data management center site, and the information is added to a national database. |

Deviation Protocol

Participants begin talking about mental health experiences or in-depth about their own health issues.

Mitigation: Remind them that the focus of the day if to talk about understanding health and wellbeing in the context of science and expanding general knowledge to benefit the whole population. There is lots of great work being done in the medical space treating individuals or small groups of individuals, but today we are interested in your insights about what science is needed to benefit the health and wellbeing of Australians.
